# Supplementary material
Source: publisher figshare collection journal article supplement (https://tandf.figshare.com/articles/dataset/_/8208803)
Supplement: Supplementary file 2 [file 3]

Archive with 4 entries (4 files):
- icmo_a_1626228_sm4064.rar
- icmo_a_1626228_sm9907.docx
- icmo_a_1626228_sm9906.tif
- icmo_a_1626228_sm9905.pdf
