# Supplementary material
Source: publisher figshare collection journal article supplement (https://tandf.figshare.com/articles/dataset/_/8208803)
Supplement: Supplementary file 2 [file 3 › icmo_a_1626228_sm9907.docx]

Table Supplement

|  | responder  **n = 34** | non-responder  **n = 26** |
| --- | --- | --- |
| **upper limb** | **10** | **6** |
| median nerve | 3 | 1 |
| radial nerve | 2 | 1 |
| ulnar nerve | 5 | 4 |
| **neck** | **1** |  |
| greater occipital nerve | 1 |  |
| **cervical plexus** |  | **1** |
| supraclavicular nerves |  | 1 |
| **thorax** | **7** | **1** |
| intercostal nerve | 7 | 1 |
| **groin** | **3** | **3** |
| genitofemoral nerve | 3 | 2 |
| ilioinguinal and iliohypogastric nerve |  | 1 |
| **pelvic** | **2** | **2** |
| pudendal nerve | 2 | 2 |
| **face** |  | **2** |
| trigeminal nerve |  | 2 |
| **lower limb** | **11** | **11** |
| lateral femoral cutaneous nerve | 3 | 2 |
| palmar digital nerve | 1 | 1 |
| peroneal nerve | 1 | 1 |
| saphenous nerve | 1 | 1 |
| sural nerve | 1 | 3 |
| tibial nerve | 4 | 3 |

**Localization of affected nerves treated by perineural BONT-A separated as responders and non-responders.**
