# Supplementary material
Source: publisher figshare collection journal article supplement (https://tandf.figshare.com/articles/dataset/_/8208803)

2014 – 2017

**patients after peripheral nerve injury and neuropathic pain**

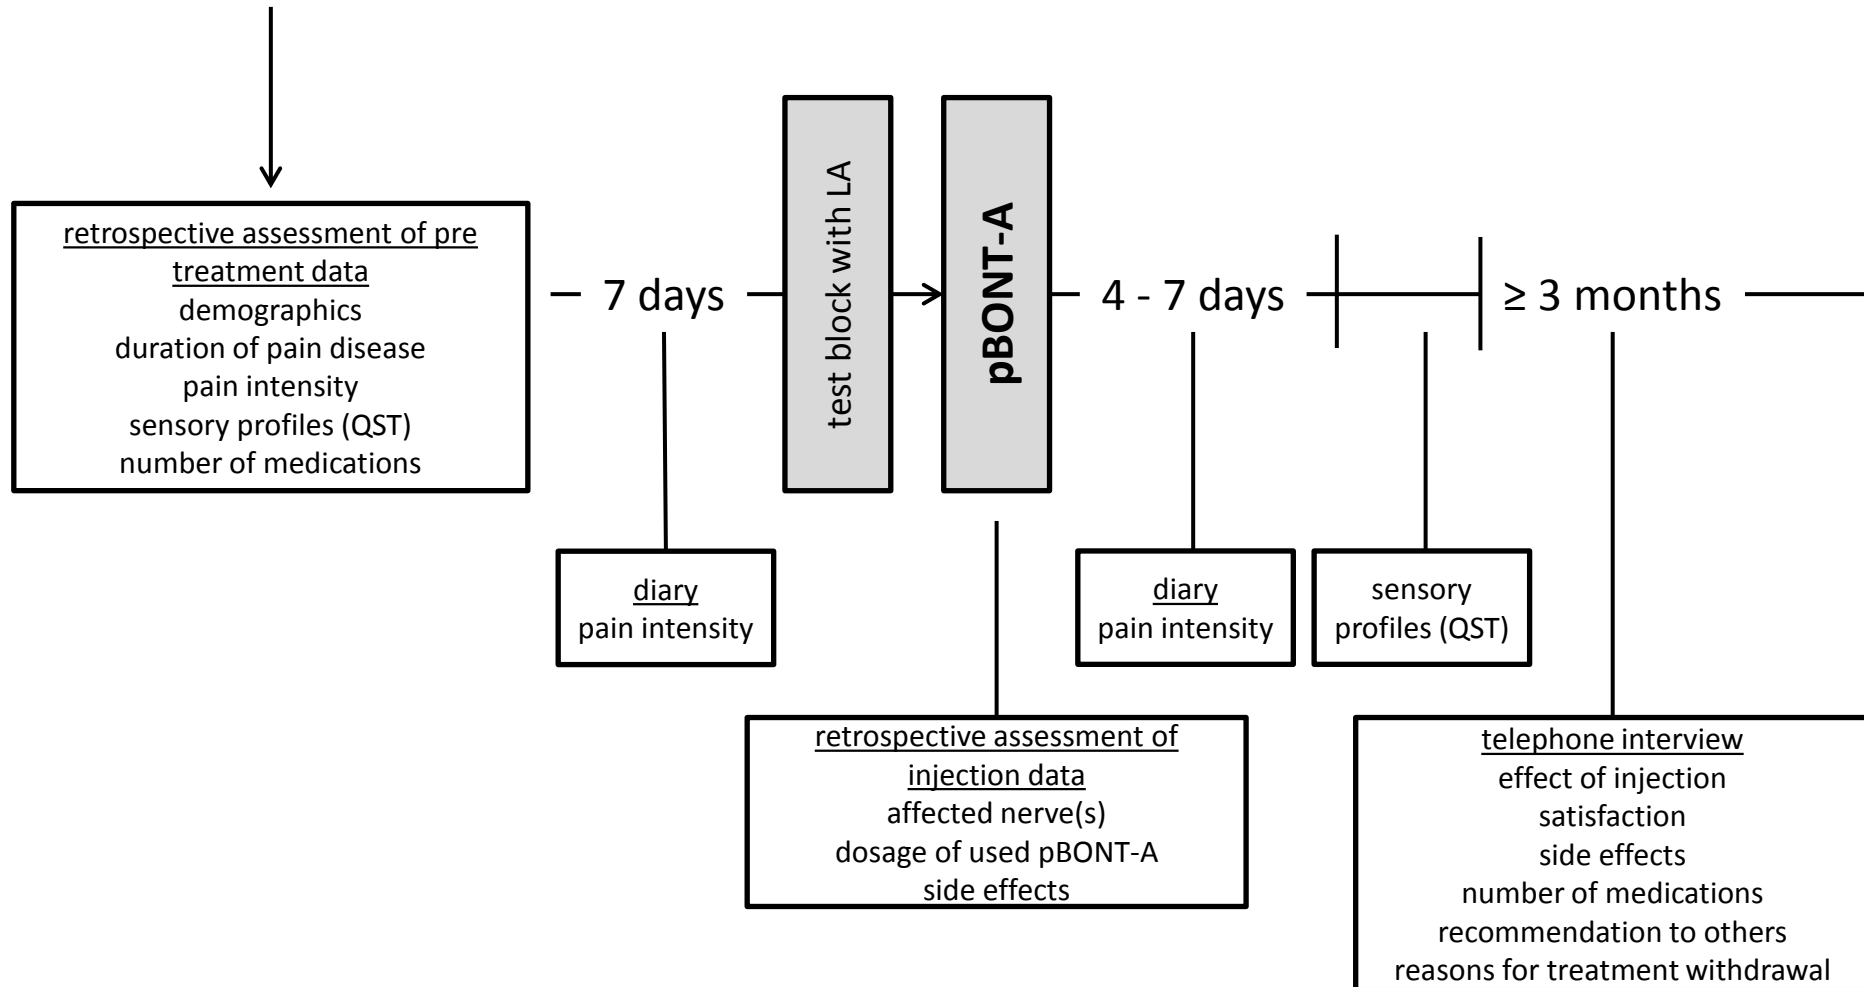

Supplement: Supplementary file 1 [file 3]

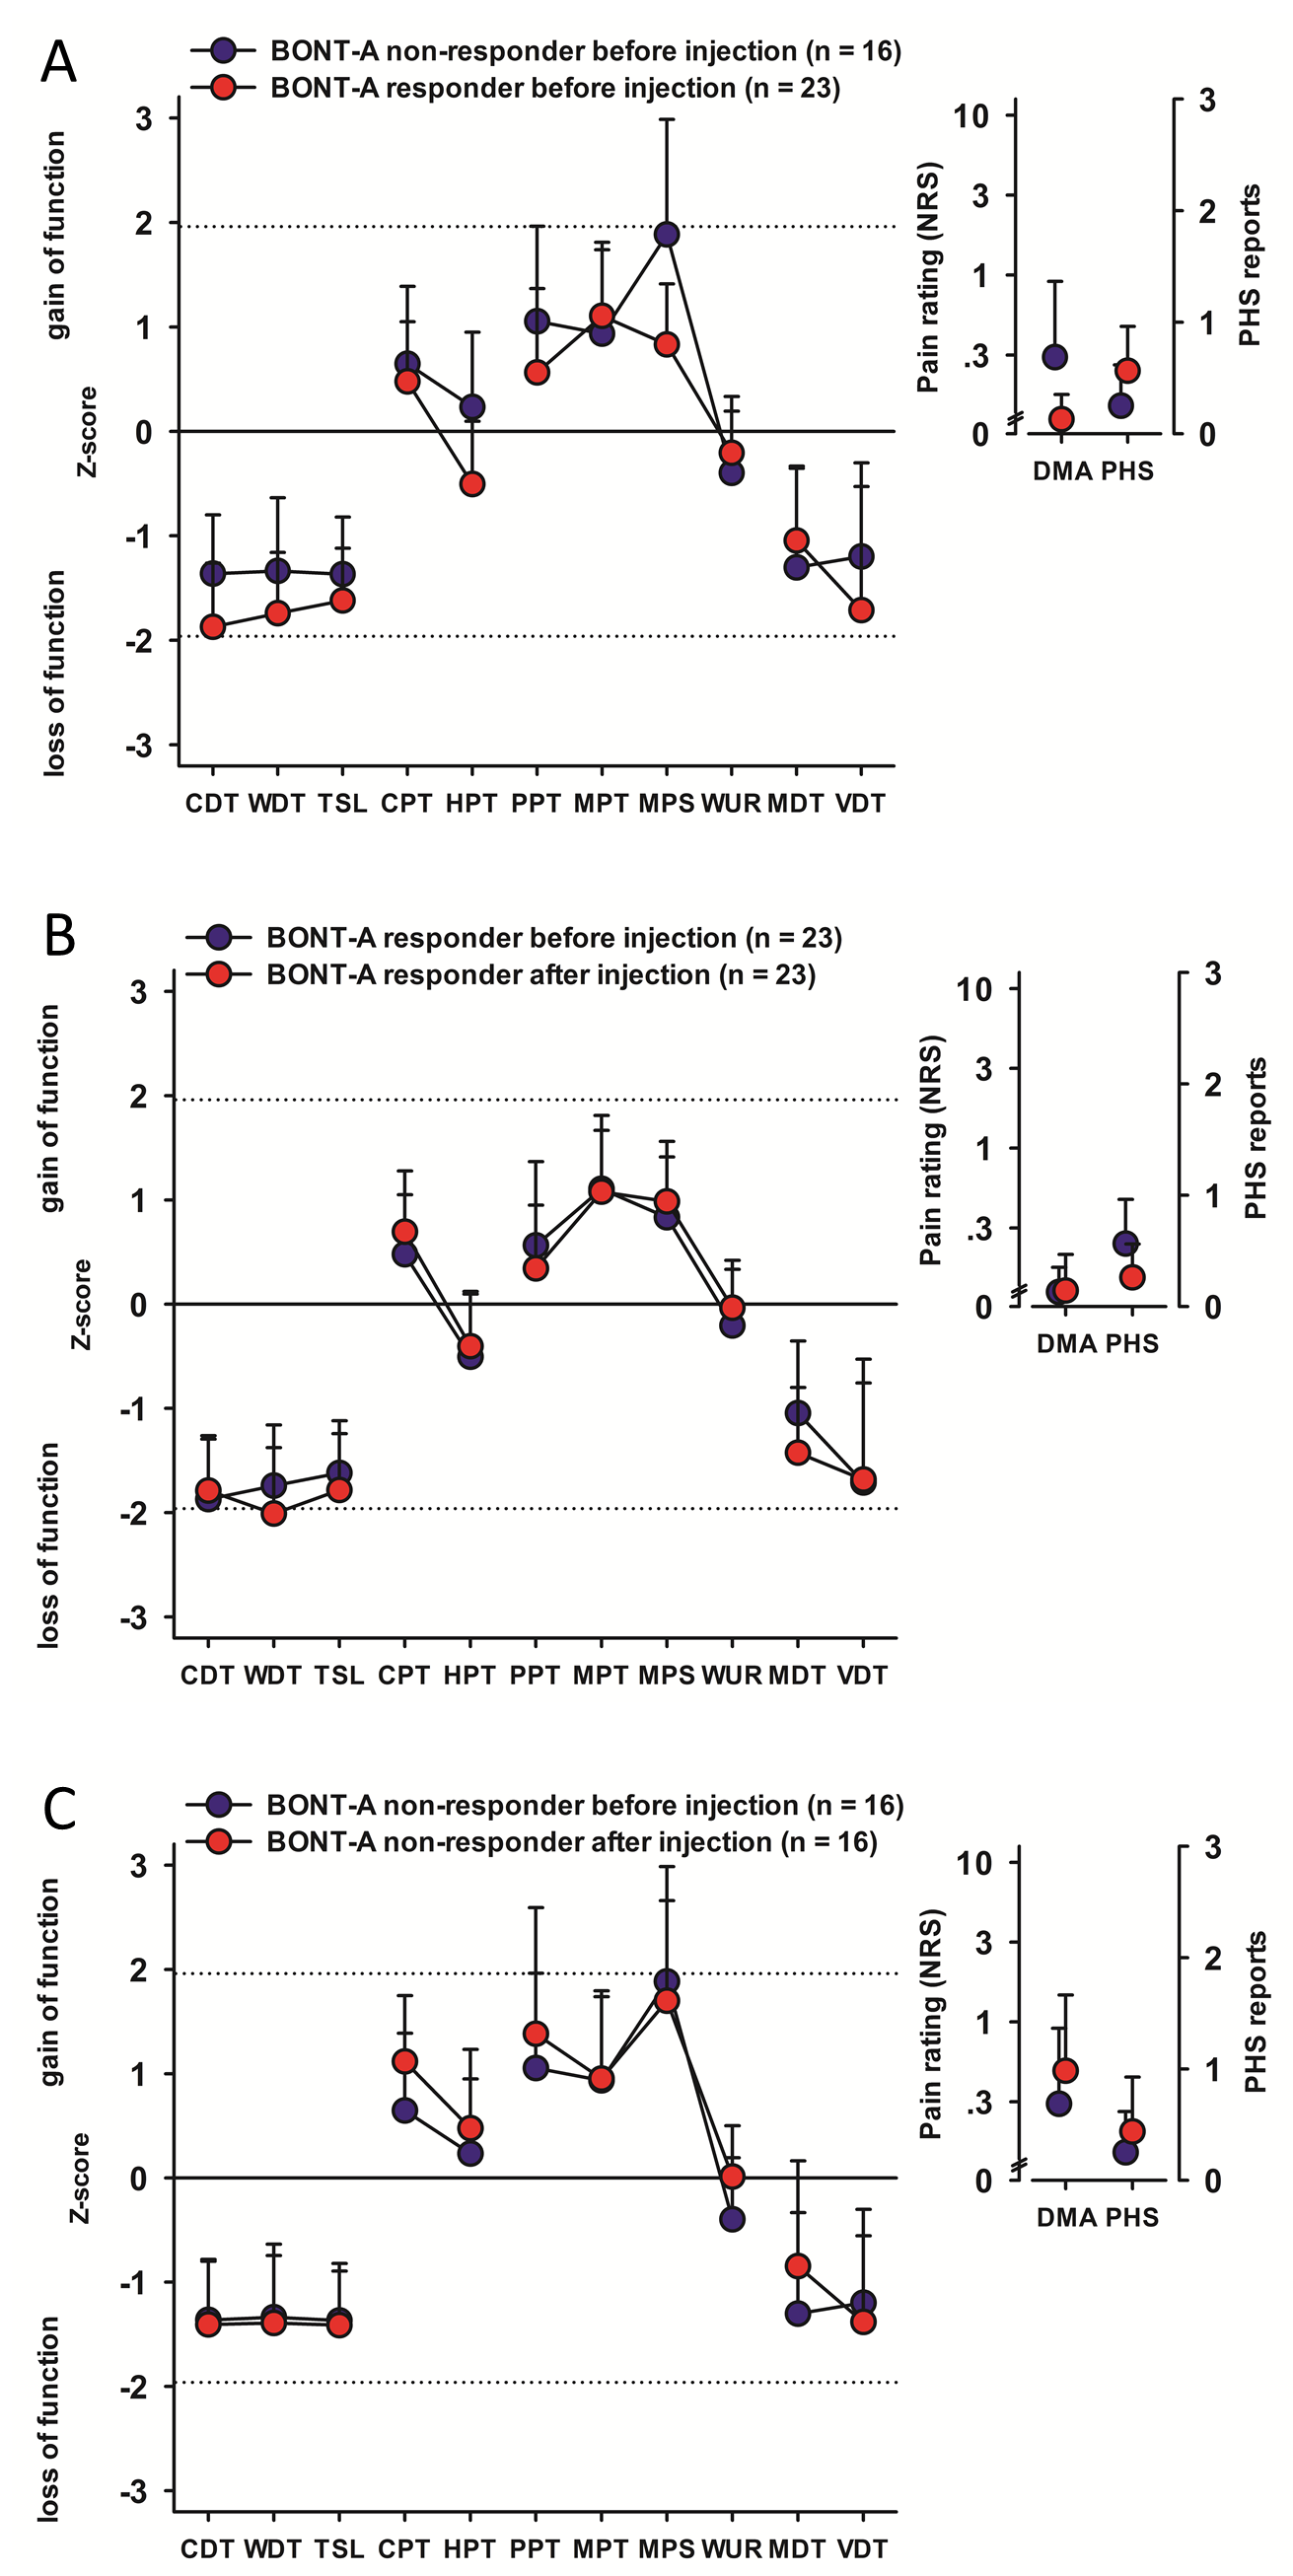

Supplement: Supplementary file 2 [file 3 › icmo_a_1626228_sm9906.tif]
